# Supplementary material for: The atomic-scale nucleation mechanism of NiTi metallic glasses upon isothermal annealing studied via molecular dynamics simulations
Source: Royal Society of Chemistry journal article supplement (doi:10.1039/c5cp04040j), 2015-01-01
Supplement: c5cp04040j1.pdf [file c5cp04040j1.pdf]

### Figure captions

**Figure S1.** The probability distributions of structure order parameter  $S_6$  for amorphous glasses, partial-crystallized glasses (crystallinity  $\chi = 0.5, 0.8$ ) and B2 crystals.

**Figure S2.** The self-diffusivity coefficients of Ni atoms ( $D_{\text{Ni}}$ ) and Ti atoms ( $D_{\text{Ti}}$ ) in the supercooled NiTi liquids at various temperatures.
